# Supplementary material
Source: Springer Nature journal article supplement (https://www.springermedizin.de/resource/supplementary/12876_2014_1125_MOESM2_ESM.pdf/9438526)

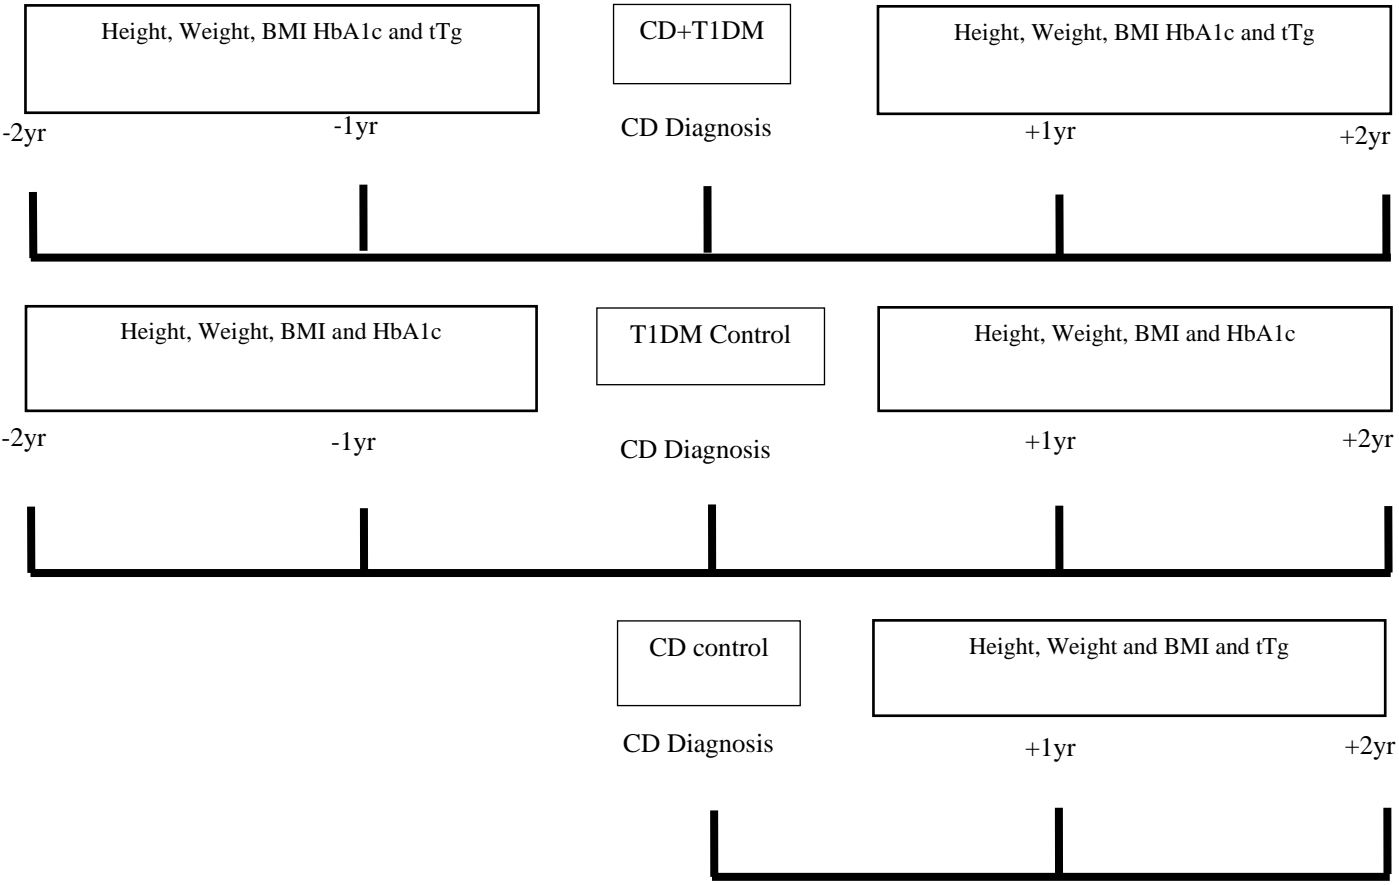

Supplement: MOESM2 [file 9438526]
